# Supplementary material for: Temperature Shift Experiments Suggest That Metabolic Impairment and Enhanced Rates of Photorespiration Decrease Organic Acid Levels in Soybean Leaflets Exposed to Supra-Optimal Growth Temperatures
Source: Metabolites. 2015 Aug 5;5(3):443–54. doi: 10.3390/metabo5030443 (PMC4588805; doi:10.3390/metabo5030443)
Supplement: Supplementary File 1 [file metabolites-05-00443-s001.xlsx]

## Sheet: Sheet1
Ambient (39 Pa) CO2
Temperature Treatment	malonate	glycerate	fumarate	succinate	malate	citrate
	Probabilities (P)
(36 C) vs (36 to 28 C)	ns	ns	ns	ns	ns	ns
(36 C) vs (28 C)	*	ns	**	**	**	**
(36 C) vs (28 to 36 C)	ns	ns	ns	ns	ns	ns
(36 to 28 C) vs (28 C)	**	ns	ns	**	*	**
(36 to 28 C) vs (28 to 36 C)	*	ns	ns	ns	ns	ns
(28 C) vs (28 to 36 C)	ns	ns	ns	*	ns	**
Elevated (70 Pa) CO2
Temperature Treatment	malonate	glycerate	fumarate	succinate	malate	citrate
	Probabilities (P)
(36 C) vs (36 to 28 C)	**	ns	ns	ns	ns	ns
(36 C) vs (28 C)	ns	ns	ns	**	**	**
(36 C) vs (28 to 36 C)	ns	ns	ns	ns	ns	ns
(36 to 28 C) vs (28 C)	**	ns	ns	**	**	**
(36 to 28 C) vs (28 to 36 C)	*	*	ns	ns	*	ns
(28 C) vs (28 to 36 C)	ns	ns	ns	*	ns	*
36 C Growth Temperature
CO2 Treatment	malonate	glycerate	fumarate	succinate	malate	citrate
	Probabilities (P)
(39 Pa) vs (39 to 70 Pa)	ns	**	*	ns	ns	ns
(39 Pa) vs (70 Pa)	ns	**	**	ns	**	*
(39 Pa) vs (70 to 39 Pa)	ns	ns	*	ns	*	*
(39 to 70 Pa) vs (70 Pa)	*	ns	*	ns	ns	ns
(39 to 70 Pa) vs (70 to 39 Pa)	*	**	ns	ns	ns	*
(70 Pa) vs (70 to 39 Pa)	ns	**	ns	ns	ns	ns

## Sheet: Sheet2
Ambient (39 Pa) CO2
Temperature Treatment	malonate	glycerate	fumarate	succinate	malate	citrate
	Probabilities (P)
(36 C) vs (36 to 28 C)	ns	ns	ns	ns	ns	ns
(36 C) vs (28 C)	*	ns	**	**	**	**
(36 C) vs (28 to 36 C)	ns	ns	ns	ns	ns	ns
(36 to 28 C) vs (28 C)	**	ns	ns	**	*	**
(36 to 28 C) vs (28 to 36 C)	*	ns	ns	ns	ns	ns
(28 C) vs (28 to 36 C)	ns	ns	ns	*	ns	**
Elevated (70 Pa) CO2
Temperature Treatment	malonate	glycerate	fumarate	succinate	malate	citrate
	Probabilities (P)
(36 C) vs (36 to 28 C)	**	ns	ns	ns	ns	ns
(36 C) vs (28 C)	ns	ns	ns	**	**	**
(36 C) vs (28 to 36 C)	ns	ns	ns	ns	ns	ns
(36 to 28 C) vs (28 C)	**	ns	ns	**	**	**
(36 to 28 C) vs (28 to 36 C)	*	*	ns	ns	*	ns
(28 C) vs (28 to 36 C)	ns	ns	ns	*	ns	*
